# Supplementary figures and images for: Optimization of silver nanoparticles synthesis via Plackett–Burman experimental design: in vitro assessment of their efficacy against oxidative stress-induced disorders
Source: Royal Society of Chemistry journal article supplement (doi:10.1039/d4ra02774d), 2024-01-01

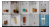

Supplement: d4ra02774d1.pdf [file d4ra02774d1.pdf]
